RESEARCH ARTICLE

# Imatinib attenuates cardiac fibrosis by inhibiting platelet-derived growth factor receptors activation in isoproterenol induced model

Le-Xun Wang<sup>1,2</sup>, Xiao Yang<sup>1,2</sup>, Yuan Yue<sup>1,2</sup>, Tian Fan<sup>3,4</sup>, Jian Hou<sup>1,2</sup>, Guang-Xian Chen<sup>1,2</sup>, Meng-Ya Liang<sup>1,2</sup>, Zhong-Kai Wu<sup>1,2\*</sup>

**1** Second Department of Cardiac Surgery, The First Affiliated Hospital, Sun Yat-sen University, Guangzhou, China, **2** Assisted Circulatory Laboratory of Health Ministry, The First Affiliated Hospital, Sun Yat-sen University, Guangzhou, China, **3** Key Laboratory of South China Agricultural Plant Molecular Analysis and Genetic Improvement, South China Botanical Garden, Chinese Academy of Sciences, Guangzhou, China, **4** Guangdong Provincial Key Laboratory of Applied Botany, South China Botanical Garden, Chinese Academy of Sciences, Guangzhou, China

☯ These authors contributed equally to this work.

\* [wuzhk@mail.sysu.edu.cn](mailto:wuzhk@mail.sysu.edu.cn)

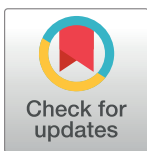

**OPEN ACCESS**

**Citation:** Wang L-X, Yang X, Yue Y, Fan T, Hou J, Chen G-X, et al. (2017) Imatinib attenuates cardiac fibrosis by inhibiting platelet-derived growth factor receptors activation in isoproterenol induced model. *PLoS ONE* 12(6): e0178619. <https://doi.org/10.1371/journal.pone.0178619>

**Editor:** Rajesh Gopalrao Katare, University of Otago, NEW ZEALAND

**Received:** December 8, 2016

**Accepted:** May 16, 2017

**Published:** June 1, 2017

**Copyright:** © 2017 Wang et al. This is an open access article distributed under the terms of the [Creative Commons Attribution License](https://creativecommons.org/licenses/by/4.0/), which permits unrestricted use, distribution, and reproduction in any medium, provided the original author and source are credited.

**Data Availability Statement:** All relevant data are within the paper and its Supporting Information files.

**Funding:** This work was supported by National Natural Science Funds of China (Grant No.81370215 and 81570039; URL: <http://www.nsf.gov.cn/>) and China Postdoctoral Science Foundation (Grant No.2016M590838; URL: <http://jj.chinapostdoctor.org.cn/>). The funders had no role in study design, data collection and analysis,

## Abstract

Cardiac fibrosis is a significant global health problem with limited treatment choices. Although previous studies have shown that imatinib (IMA) inhibited cardiac fibrosis, the anti-fibrotic mechanisms have not been clearly uncovered. The aim of this study is to evaluate whether IMA attenuates cardiac fibrosis by inhibiting platelet-derived growth factor receptors (PDGFR) on isoproterenol (ISO)-induced mice. Adult male C57BL/6 mice were treated with vehicle or ISO ± IMA for one week. After echocardiography examination, the hearts of mice were used for histopathologic, RT-qPCR, and western blot analyses. We found that the ventricular wall thickness, cardiac hypertrophy, and apoptosis were enhanced following ISO treatment. IMA decreased the left ventricular wall thickness, prevented hypertrophy, and inhibited apoptosis induced by ISO. In addition, IMA attenuated the accumulation of collagens and  $\alpha$ -smooth muscle actin ( $\alpha$ -SMA) (the markers of fibrosis) caused by ISO treatment. Moreover, the expression of fibrosis related genes, and the phosphorylation of PDGFRs in ISO-treated mice hearts were inhibited by IMA as well. However, IMA did not change the expression of the matrix metalloproteinase-9 (MMP-9) in ISO-treated hearts. Furthermore, IMA reduced the expressions of collagens as well as  $\alpha$ -SMA caused by activation of PDGFR $\alpha$  in cardiac fibroblasts. Taken together, our data demonstrate that IMA attenuated the cardiac fibrosis by blocking the phosphorylation of PDGFRs in the ISO-induced mice model. This study indicates that IMA could be a potentially therapeutic option for cardiac fibrosis in clinical application.

decision to publish, or preparation of the manuscript.

**Competing interests:** The authors have declared that no competing interests exist.

## Introduction

Cardiac fibrosis, one of the common pathological manifestations following many cardiovascular disease conditions such as cardiac surgery, myocardial ischemia, myocardial infarction and chronic hypertrophy induced by pressure overload, is characterized by the excessive production and deposition of the extracellular matrix (ECM) proteins in heart, and seriously affects the prognosis of patients [1–3]. Various reports have shown that cardiac fibroblasts play the important roles in the occurrence, the development and the outcome of cardiac fibrosis [2, 4–8]. Aldosterone, angiotensin II (Ang II), transforming growth factor- $\beta$ 1 (TGF- $\beta$ 1), platelet-derived growth factors (PDGFs), endothelin-1 (ET-1) and tumor necrosis factor- $\alpha$  (TNF- $\alpha$ ) are known to promote the fibroblast activation and cardiac fibrosis [1, 9–11]. After binding the ligands (PDGFs and TGF- $\beta$ 1), tyrosine kinase receptors (PDGFRs and TGF- $\beta$ 1 receptor) are activated and play the core role in the cardiac fibrosis [1]. However, the definite mechanisms responsible for cardiac fibrosis have not been uncovered. Therefore, there are currently no effective therapies that can prevent its occurrence or halt its progression.

Imatinib mesylate (Imatinib, IMA), a small molecule inhibitor of tyrosine kinase (TKI), has been approved for the treatment of BCR-ABL positive leukemia and gastrointestinal stromal tumors (GIST), which has dramatically improved the clinical outcome of those cancers [12, 13]. IMA inhibits not only BCR-ABL/c-Abl and c-Kit kinases activation but also other tyrosine kinase, such as PDGFRs [14]. The potential treatment effect of IMA in non-malignant diseases such as fibrosis has been paid more attention. The anti-fibrotic effect of IMA has been demonstrated in pulmonary fibrosis, liver fibrosis, scleroderma fibroblasts, and renal fibroblasts [14–17]. IMA could attenuate cardiac fibrosis in spontaneously hypertensive rat model [18], desoxycorticosterone induced salt-sensitive hypertensive rat model [19], and myocardial infarction model [20]. The mechanism of IMA in different model is diverse.

Chronic stimulation by catecholamines such as isoproterenol (ISO) in animal models is known to induce cardiac hypertrophy, fibroblast activation, and fibrosis [10, 21–23]. However, the anti-fibrotic effect of IMA in ISO-induced cardiac fibrosis has not been investigated. The aim of this study was to evaluate the effect of IMA in ISO-induced cardiac fibrosis mice model. Then we examined whether IMA inhibited PDGFRs tyrosine kinase activity in attenuating cardiac fibrosis *in vivo* and *in vitro*.

## Materials and methods

### Reagents

Isoproterenol (ISO) was purchased from Sigma-Aldrich (St. Louis, MO, USA) and dissolved in PBS. Imatinib (IMA) was obtained from MedChem Express (Monmouth Junction, NJ, USA) and dissolved in PBS. Phenylmethanesulfonyl fluoride (PMSF) was purchased from Sigma-Aldrich. Recombinant murine Platelet-Derived Growth Factor-AA (PDGF-AA) was obtained from PeproTech (Rocky Hill, NJ, USA).

### Animal and treatments

Adult male C57BL/6 mice (11–13 weeks old) were divided into 4 groups: vehicle, ISO, IMA, IMA plus ISO. The vehicle group was treated with PBS. Cardiac fibrosis was induced by subcutaneous ISO injection daily (20 mg/kg/d for 7 days) [24–26], and/or IMA (40 mg/kg/d for 7 days) [27, 28] was administered by intraperitoneal injection daily. After 7 days, animal echocardiography was used to preliminarily evaluate the success of the cardiac fibrosis model. At the end of the study mice were anesthetized with 3% isoflurane and a terminal blood sample was drawn immediately from the left ventricle. Blood was centrifuged and serum was stored at

-80°C. Euthanasia was performed by cervical dislocation under deep anesthesia with isoflurane at day 8, and hearts were excised and frozen in liquid N<sub>2</sub> and stored at -80°C until biochemical analysis or fixed in paraformaldehyde for histological analysis. No mice died before the end of the experiment. All animals used in the present study were purchased from the animal center of Sun Yat-sen University and raised carefully in accordance with the Guide for the Care and Use of Laboratory Animals (2011). All experimental procedures were approved by the Animal Care and Use Committee of Sun Yat-sen University (Permit Numbers: SCXK (Guangdong) 2015-0107).

### Echocardiography

Mice were anaesthetized with 1.5% isoflurane/oxygen, and cardiac function was assessed using transthoracic echocardiography (VisualSonics system, Toronto, Ontario, Canada) performed at day 8. M-mode and two-dimensional echocardiography were performed to assess cardiac parameters, including left ventricular (LV) end-diastolic dimension, wall thickness, LV fractional shortening and ejection fraction, whilst pulse-wave Doppler was used to assess mitral valve flow (E/A ratio), as reliable measures of diastolic function.

### Immunoassay for serum cardiac troponin T (cTnT)

Serum cTnT was assayed by enzyme-linked immunosorbent assay (ELISA) using mouse immunoassay kits from Uscn Life Science Inc. (Wuhan, China), according to the protocol.

### Real-time quantitative polymerase chain reaction (RT-qPCR)

Total RNA was extracted from the ventricle of heart or cells by TRIzol reagent (Invitrogen), and cDNA was synthesized using the qPCR RT Master Mix kit (TOYOBO, Osaka, Japan). PCR primers were designed and synthesized by Invitrogen (Shanghai, China), as illustrated in Table 1. Quantitative PCR analysis was performed according to the instructions using a KOD SYBR qPCR Mix (TOYOBO) by LightCycle 480 (Roche, Basel, Switzerland). For analysis, the expression of target genes was normalized to the GAPDH.

### Western blot analysis

Proteins were isolated from the ventricular homogenate or cells with lysis buffer (Beyotime Institute of Biotechnology, Shanghai, China) with PMSF. Equal amounts of protein were

**Table 1. Primer sequences used for RT-PCR.**

| Gene (Mouse)   | Forward               | Reverse                  |
|----------------|-----------------------|--------------------------|
| GAPDH          | GGTCATCCATGACAACCTT   | GGGGCCATCCACAGTCTT       |
| collagen I     | AACTCCCTCCACCCCAATCT  | CCATGGAGATGCCAGATGGTT    |
| collagen III   | ACGTAAGCACTGGTGACAG   | GGAGGGCCATAGCTGAAC TG    |
| PDGF-A         | AGCGTCAAGTGCCAGCCTTC  | CTCACCTCACATCTGTCTCCTCCT |
| PDGF-B         | GGGTGAGCAAGGTGTGAATG  | AAGGAAGTGGAGGCAATGGACAG  |
| PDGF-C         | GCTGCTGATGCTGGCTATGGT | GATTGACTCCTCTGGTGCCCTCTG |
| PDGF-D         | TGACATGGTGGCTCCGTTCC  | TCCTCTGACAACAGTGCTGCTCTC |
| PDGFR $\alpha$ | CAACCACACTCAGACGGATG  | GCGGCAAGGTATGATGGCAGAG   |
| PDGFR $\beta$  | GCGACACTCCAACAAGCAT   | TGTAGCCACCGTCACTCTC      |
| TGF- $\beta$ 1 | ACCGCAACAACGCCATCTAT  | TTCAGCCACTGCCGTACAAC TC  |
| CCN2           | TGTCTTCGGTGGGTCGGTGT  | CAGGCAGTTGGCTCGCATCATAG  |
| HGF            | TCAGCACCATCAAGGCAAGG  | GCACATCCACGACCAGGAACAAT  |
| MMP-9          | AACCACAGCCGACAGCACCT  | ATCCAGTACCAACCGTCTCTGAAG |

<https://doi.org/10.1371/journal.pone.0178619.t001>

subjected to SDS-PAGE and transferred to PVDF membranes (Millipore, Billerica, MA, USA). The membranes were blocked and then incubated with GAPDH (Proteintech, Rosemont, IL, USA), MMP-9,  $\alpha$ -SMA, p-PDGFR $\alpha$  (Tyr720), PDGFR $\alpha$  (Abcam, Cambridge, MA, USA), p-PDGFR $\beta$  (Tyr740), PDGFR $\beta$  (Cell Signaling Technology, Danvers, MA, USA), PDGF-A, PDGF-B, PDGF-C and PDGF-D (Bioss, Beijing, China). Subsequently, the membranes were incubated with an HRP-conjugated secondary antibody (Thermo Fisher Scientific, Waltham, MA, USA) at room temperature for 1 h and were visualized using enhanced chemiluminescence reagents (Sigma-Aldrich) according to the manufacturer's instruction.

## Cell culture

Cardiac fibroblasts were harvested from adult C57BL/6 mice and cultured as reported previously [29]. Briefly, hearts were removed and washed with PBS. After enzymatic digestion by 0.1% Collagenase II (Gibco, South Logan, UT, USA), cardiac fibroblasts were cultured in Dulbecco's modified Eagle's medium (DMEM, Gibco) supplemented with 100 U/ml penicillin, 100 ug/ml streptomycin and 10% fetal bovine serum (FBS, Gibco). After three passages, cells were collected and passaged for further experiments. All cells cultures were maintained at 37°C in an atmosphere of 5% CO<sub>2</sub>. After three passages, cardiac fibroblasts were cultured in presence PDGF-AA (10 ng/ml) for 24 h, and the cells were harvested for protein expression assays by western blotting or mRNA assays using RT-qPCR.

## Histological analysis

Excised hearts were fixed in 4% paraformaldehyde, paraffin embedded, and sectioned at 5  $\mu$ m thickness. Deparaffinized sections were stained for Hematoxylin-Eosin (H&E) or picrosirius red staining. Image-Pro Plus software (Media Cybernetics, Rockville, MD, USA) was used to measure fibrosis from 10 random fields per section. FITC was used to measure apoptosis in deparaffinized heart sections via terminal deoxynucleotidyl-transferase-mediated dUTP nick-end labeling (TUNEL, Roche). Deparaffinized sections were incubated with proteinase K, and DNA strand breaks were labeled according to manufacturer's instructions. Cells were visualized at the Zeiss microscope (Carl Zeiss, Jena, Germany) and the percentage of TUNEL-positive nuclei calculated from 10 random fields per section.

## Immunohistochemistry (IHC)

Ki-67 or  $\alpha$ -SMA was detected in the ventricle of mice heart by IHC. After ethanol exposure and hydration, the sections were rinsed in PBS, quenched for 10 min in methanol containing 3% H<sub>2</sub>O<sub>2</sub>, and incubated for 15 min in blocking solution (PBS containing 2% BSA and 0.1% Triton X-100), followed by incubation overnight in primary antibodies against Ki-67 (Sigma-Aldrich, diluted 1:50) or  $\alpha$ -SMA (Abcam, diluted 1:400) in blocking solution. After washing with PBS, the sections were incubated for 60 min with the secondary antibody (Goat anti-rabbit IgG, (H+L), horseradish peroxidase conjugated, Thermo Fisher Scientific). DAB substrate kit for peroxidase was then used to stain sections as described in the manufacturer's instructions (Sigma-Aldrich). The sections were counterstained with hematoxylin. The images were acquired using a Zeiss microscope. The expression region of Ki-67 or  $\alpha$ -SMA was quantified and analyzed using the Image-Pro Plus software.

## Statistical analysis

Data were presented as mean  $\pm$  SEM. Statistical analysis was performed using GraphPad Prism Software (Version X, La Jolla, CA, USA) and SPSS v. 16.0 (SPSS, Inc. Armonk, NY, USA). The



ANOVA with Tukey's multiple comparisons test (equal variance) or the Kruskal-Wallis test, followed by Dunn's Multiple Comparison test (unequal variance) was used for multiple comparisons.  $p < 0.05$  was considered statistically.

## Results

### IMA decreased the left ventricular (LV) wall thickness in ISO-induced mice model

To assess changes of the cardiac structure and function in response to catecholamine or/and IMA stimulation, adult male C57BL/6 mice were treated with vehicle, ISO (20mg/kg/d, injected subcutaneously everyday), IMA (40mg/kg/d, injected intraperitoneally everyday), IMA + ISO for one week. Cardiac function of the mice was assessed using echocardiography. As shown in Fig 1A, treatment with ISO increased the LV wall thickness in comparison with that of vehicle treatment. Compared to ISO-treated group, IMA + ISO-treated group was showed to decrease the LV wall thickness significantly (Fig 1A and Table 2). The LVIDd was significantly lower in the ISO group than that in the IMA + ISO, IMA and vehicle groups (Table 2). Combined IMA + ISO treatment prevented ISO-mediated increase in heart rate (HR), IVSd, IVPWd, IVSs, and IVPWs, whereas IMA did not induce changes in cardiac function on its own compared to vehicle (Table 2). No significant differences were found in LV percent fractional shortening (FS), percent ejection fraction (EF), E/A ratio, LVEVd, LVEVs, and LVIDs among the vehicle, IMA, ISO and IMA + ISO groups (Fig 1B and Table 2). These results suggested that IMA improved left ventricular structure in ISO-induced mice model.

### IMA inhibits ISO-induced cardiac hypertrophy but has no obvious harm to mice

Previously report showed that ISO could induce the cardiac hypertrophy [30]. We assessed the changes of hearts weight among four groups. The hearts of ISO-treated group were bigger than that in vehicle-treated group and IMA + ISO-treated group (Fig 1C). Heart weight to body weight ratio was significantly lower in the IMA + ISO group than that in the ISO group ( $p < 0.01$ ) (Fig 1D). No significant difference in the heart weight to body weight ratio was found among the vehicle, IMA, and IMA + ISO groups (Fig 1D).

We also assessed the safety of treatment with ISO  $\pm$  IMA on mice. The serum cTnT did not change in any of the groups (Fig A in S1 Fig). The body weights of the mice were stable, with no significant differences among the vehicle-, IMA -, ISO- and IMA + ISO-treated groups (Fig B in S1 Fig). Motor activity and feeding behavior were all normal.

### Effects of IMA on the heart cells survival

Next, we examined the cells apoptosis and proliferation in heart of model mice. Apoptosis, as estimated via TUNEL-positive nuclei was significantly increased at one week following ISO treatment compared to vehicle treatment ( $p < 0.01$ ), and IMA treatment prevented ISO-induced apoptosis ( $p < 0.05$ ) (Fig 2A and 2B). In ISO-treated group, the number of Ki-67 proliferating interstitial cells was increased compared with vehicle group (Fig 2C and 2D). IMA inhibited the increase of proliferation induced by ISO ( $p < 0.05$ ) (Fig 2C and 2D).

### IMA inhibits ISO-induced cardiac fibrosis

In addition to hypertrophy, cardiac fibrosis was estimated by RT-qPCR and sirius red staining. As shown in Fig 3A, ISO treatment significantly increased the mRNA levels of collagen I and III when compared with vehicle treatment, and IMA attenuated the increases of collagens

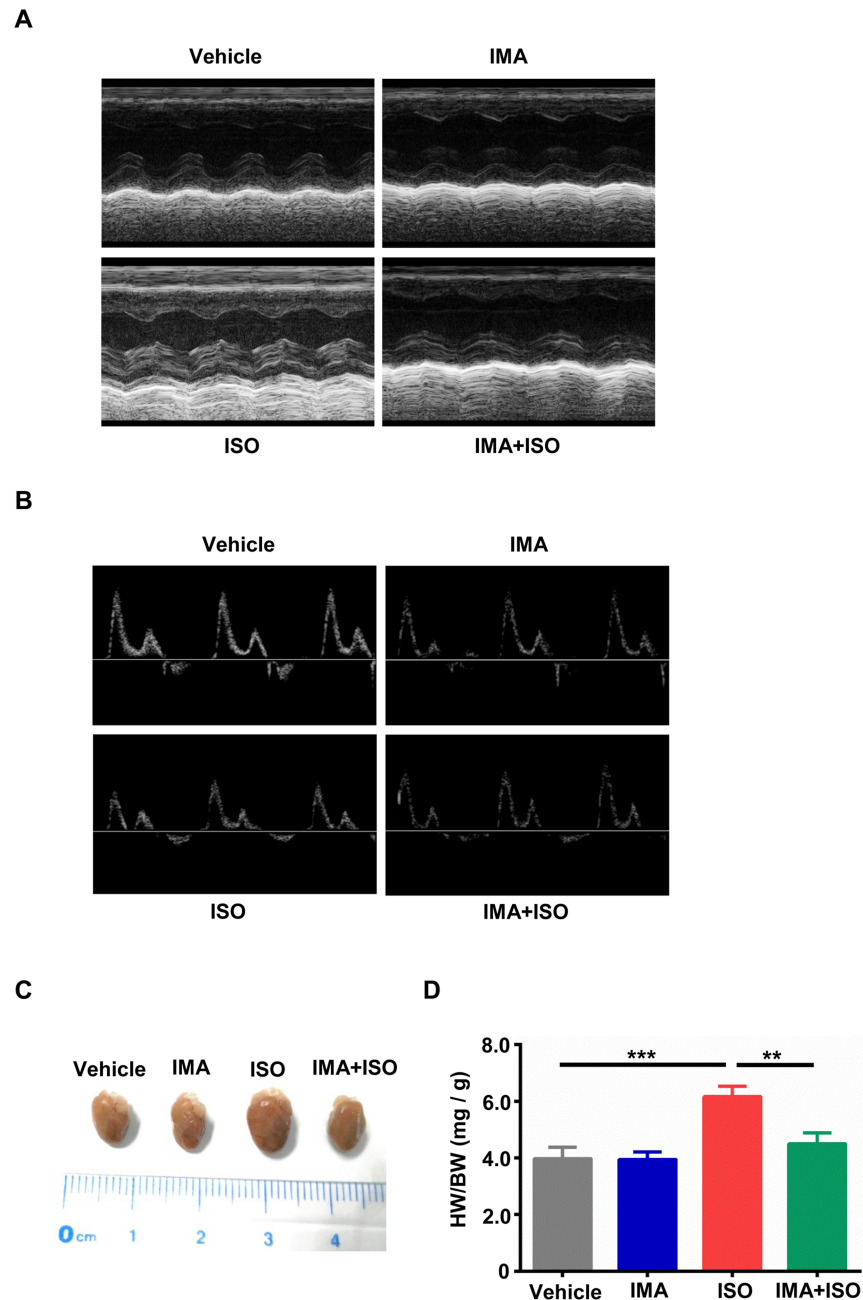

**Fig 1. IMA reduces the ventricular wall thickness and cardiac hypertrophy caused by ISO.** Mice were treated with vehicle, Imatinib (IMA, 40mg/kg/d, injected intraperitoneally everyday), Isoproterenol (ISO, 20mg/kg/d, injected subcutaneously everyday), IMA + ISO for 7 days. (A) The ventricular wall thickness was detected by M-mode echocardiography at day 8. (B) The early to late diastolic peak velocity (E/A) ratio was detected by Doppler echocardiography at day 8. (C) Hearts removed from one mouse in each group are shown. (D) The gravimetric analysis of heart weight to body weight (HW/BW) ratio. (n = 5–8 per group, \*\*:  $p < 0.01$ , \*\*\*:  $p < 0.001$ ).

<https://doi.org/10.1371/journal.pone.0178619.g001>

caused by ISO. Heart sections were stained with sirius red and observed under a light microscope. Sirius red staining showed striking collagen deposition in the ventricular wall from ISO-treated mice compared with vehicle-treated animals (Fig 3B). Quantitative histology analysis demonstrated that interstitial fibrosis was increased in ISO-treated group when compared

**Table 2. Echocardiographic parameters.**

| Variables | Vehicle    | IMA(40mg/kg/d) | ISO(20mg/kg/d) | IMA+ISO     |
|-----------|------------|----------------|----------------|-------------|
| HR        | 456±31     | 463±24         | 558±31 * &     | 485±25      |
| IVSd(mm)  | 0.60±0.04  | 0.68±0.06      | 0.87±0.05 * &  | 0.74±0.04 * |
| LVIDd(mm) | 4.21±0.15  | 4.10±0.15      | 3.42±0.11 * &  | 3.86±0.06 * |
| LVPWd(mm) | 0.63±0.06  | 0.62±0.04      | 0.85±0.07 * &  | 0.75±0.04   |
| LVEVd(μL) | 37.57±2.12 | 36.58±3.02     | 34.43±2.51     | 35.28±2.07  |
| IVSs(mm)  | 0.91±0.06  | 0.94±0.06      | 1.27±0.09 * &  | 1.05±0.10   |
| LVIDs(mm) | 3.17±0.11  | 3.05±0.10      | 2.79±0.12      | 2.88±0.13   |
| LVPWs(mm) | 1.01±0.11  | 1.21±0.18      | 1.75±0.06 * &  | 1.36±0.17   |
| LVEVs(μL) | 16.77±1.15 | 16.21±2.41     | 14.52±3.45     | 14.97±2.12  |
| FS,%      | 32.37±1.92 | 33.57±2.25     | 28.28±2.15     | 30.47±2.28  |
| EF, %     | 60.36±3.89 | 56.77±5.03     | 53.21±4.17     | 53.72±4.85  |
| E, mm/s   | 564±33     | 543±40         | 464±28         | 546±41      |
| A, mm/s   | 271±21     | 261±43         | 229±26         | 267±35      |
| E/A ratio | 2.08±0.04  | 2.10±0.19      | 2.03±0.13      | 2.05±0.11   |

Data were expressed as mean ± SEM. HR: Heart Rate; IVSd: end-diastolic interventricular septal thickness; IVSs: end-systolic interventricular septal thickness; LVIDd: end-diastolic left ventricular internal diameter; LVIDs: end-systolic left ventricular internal diameter; LVPWd: end-diastolic left ventricular posterior wall thickness; LVPWs: end-systolic left ventricular posterior wall thickness; LVEVd: end-diastolic left ventricular volume; LVEVs: end-systolic left ventricular volume; FS: fractional shortening; EF: Ejection Fraction; E: peak early diastolic flow; A: peak late diastolic flow; E/A ratio: left ventricular early to late diastolic peak velocity ratio. (n = 10–13 per group).

\*:  $p < 0.05$  compared with vehicle;

&:  $p < 0.05$  compared with IMA+ISO. IMA: imatinib; ISO: isoproterenol

<https://doi.org/10.1371/journal.pone.0178619.t002>

with that in vehicle-treated group ( $p < 0.01$ ), and it was decreased in IMA + ISO-treated group when compared with that in ISO-treated group ( $p < 0.01$ ) (Fig 3B).

Then we tested the protein expression of  $\alpha$ -SMA in hearts using western blotting assay. As shown in Fig 3C, ISO treatment significantly increased the level of  $\alpha$ -SMA compared with vehicle treatment ( $p < 0.05$ ), and the level of  $\alpha$ -SMA was decreased in IMA + ISO-treated group ( $p < 0.05$ ). The immunohistochemistry result of  $\alpha$ -SMA in hearts sections was similar to result of western blot (S2 Fig).

### IMA reduces the expression of fibrosis related genes induced by ISO

Due to the crucial role of PDGFs in fibrosis, we examined the protein changes of PDGFs in model mice hearts. The myocardial protein expressions of PDGF-A, PDGF-B, PDGF-C and PDGF-D were examined by Western blot. As shown in Fig 4A, treatment with ISO significantly increased the protein levels of PDGF-A and PDGF-C when compared with vehicle treatment ( $p < 0.01$  for PDGF-A;  $p < 0.05$  for PDGF-C), and the protein levels of PDGF-A and PDGF-C were decreased in IMA + ISO-treated mice hearts compared to that in ISO-treated hearts ( $p < 0.01$  for PDGF-A;  $p < 0.05$  for PDGF-C). The levels of PDGF-B and PDGF-D did not significantly change in any of the treatment groups (Fig 4A). The mRNA result of PDGFs in hearts was similar to result of western blot (S3 Fig). Then we tested the mRNA changes of two important molecules associated with fibrosis: connective tissue growth factor (CTGF, also named Ccn2) and hepatocyte growth factor (HGF). They were significantly increased in ISO group when compared with that in vehicle group and decreased by IMA + ISO treatment (Fig 4B).

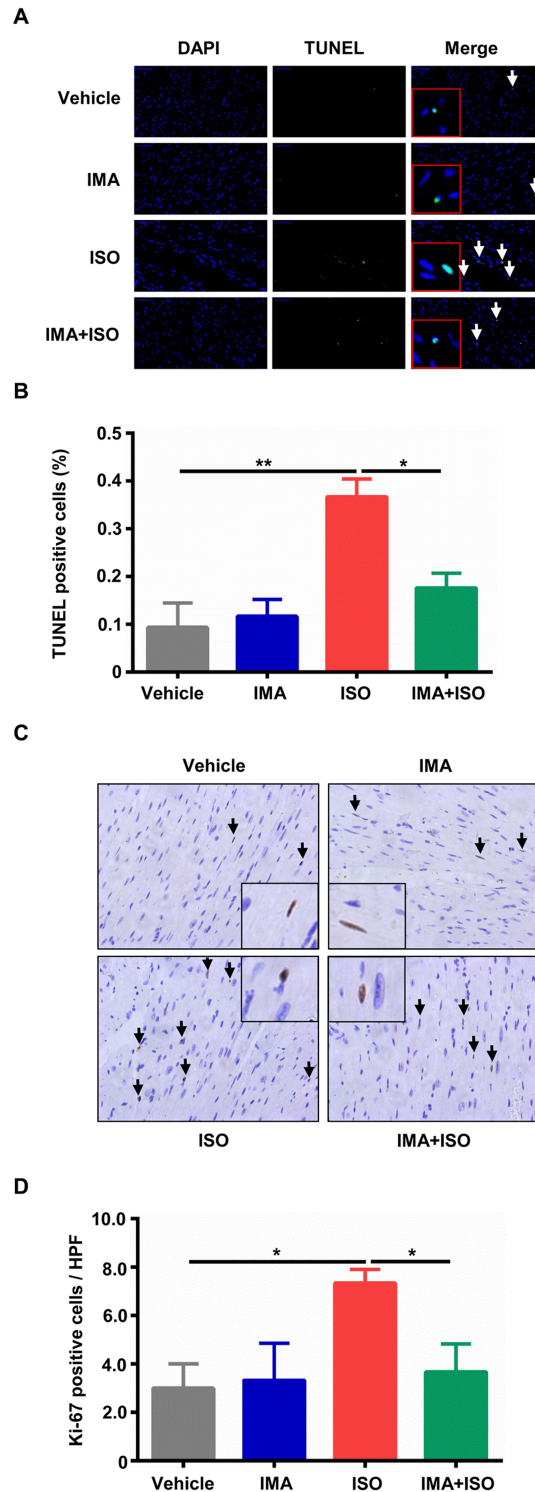

**Fig 2. Effects of IMA on the heart cells survival.** (A) (B) Representative transferase-mediated dUTP nick-end labeling (TUNEL) staining (400 $\times$ ), and percentage of TUNEL positive cells in the hearts sections from mice treated with vehicle, IMA, ISO, IMA + ISO for one week are shown. Ki-67 was tested by immunohistologic analysis (400 $\times$ ). (C) (D) The percentage of Ki-67 positive cells in the hearts sections from mice treated with vehicle, IMA, ISO, IMA + ISO for one week are shown. (n = 5–8 per group, \*:  $p < 0.05$ , \*\*:  $p < 0.01$ ). HPF: High Power Field.

<https://doi.org/10.1371/journal.pone.0178619.g002>

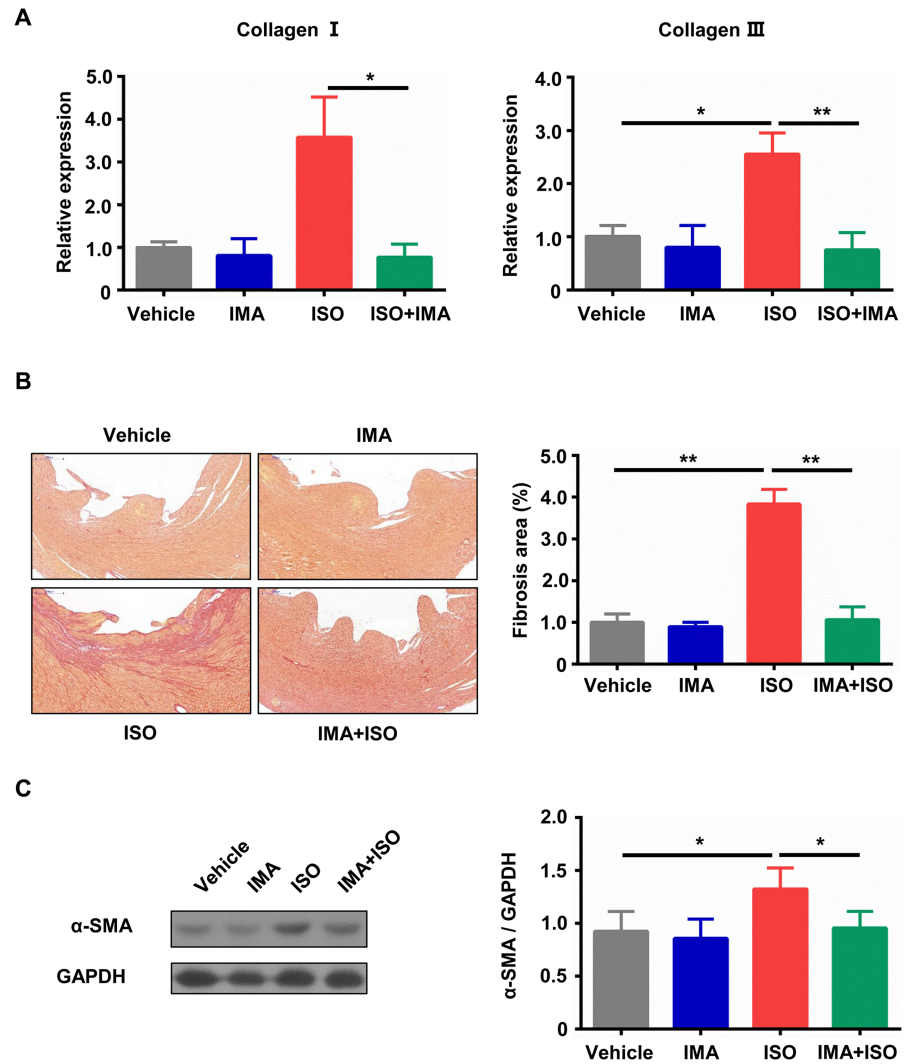

**Fig 3. IMA inhibits ISO-induced cardiac fibrosis.** (A) Myocardial mRNA expression of collagen I and III was decreased in mice hearts treated with IMA + ISO compared with that in ISO treated mice hearts. (B) Histopathological features of collagen deposition by Sirius red staining of heart sections from mice model (100×), and quantification of sirius red staining. (C) The lysates of hearts tissue from mice treated with vehicle, IMA, ISO, IMA + ISO for one week were subjected to western blotting to analyze the expression of α-SMA, and quantitative analysis of the α-SMA expression. (n = 8 per group, \*:  $p < 0.05$ , \*\*:  $p < 0.01$ ). (The Kruskal-Wallis test, followed by Dunn's Multiple Comparison test, was used to perform statistical comparison for mRNA expression of collagen I.).

<https://doi.org/10.1371/journal.pone.0178619.g003>

TGF-β1 is known to play a major role in the fibrotic processes [31]. The mRNA change of TGF-β1 in mice hearts was examined. ISO treatment significantly upregulated the TGF-β1 mRNA expression when compared with vehicle treatment and IMA + ISO treatment ( $p < 0.05$ ), and there was no significant difference between vehicle-treated group and IMA + ISO-treated group (Fig 4B).

### IMA inhibits the kinase activation of PDGFRs *in vivo*

PDGFs exert their biological effects through binding and activation of two receptor tyrosine kinases, PDGFRα and PDGFRβ [32]. Due to the important role of PDGFs/PDGFRs signaling



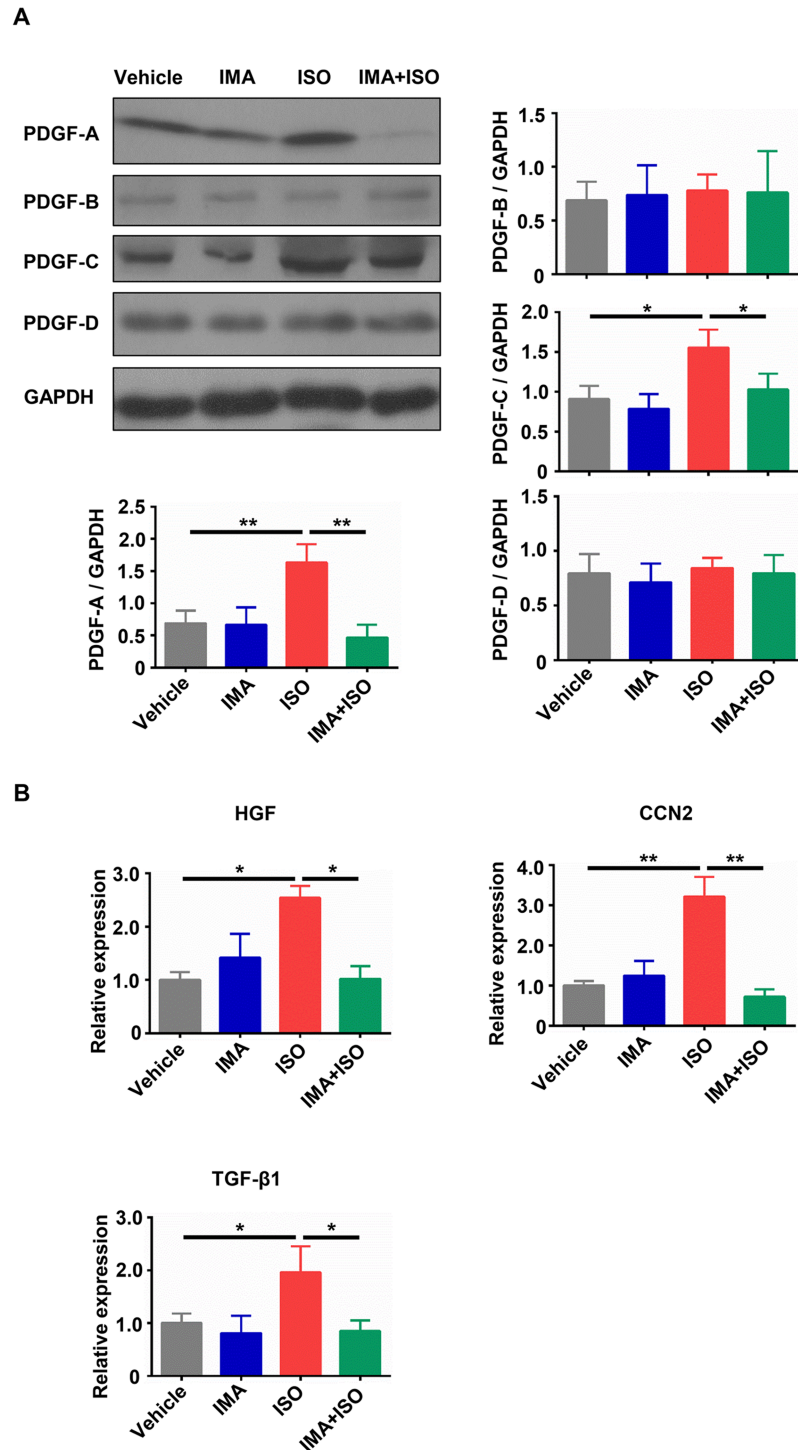

**Fig 4. IMA reduces the expression of fibrosis related genes induced by ISO.** (A) The protein expression of PDGF-A, PDGF-B, PDGF-C, and PDGF-D in hearts from mice treated with vehicle, IMA, ISO, IMA + ISO for one week was tested by Western blot. (B) The mRNA level of HGF, CCN2, and TGF-β1 in hearts from mice treated with vehicle, IMA, ISO, IMA + ISO for one week was tested by RT-qPCR. (n = 5–8 per group, \*:  $p < 0.05$ , \*\*:  $p < 0.01$ ).

<https://doi.org/10.1371/journal.pone.0178619.g004>



pathway in the fibrosis [33], the changes of PDGFR $\alpha$  and  $\beta$  in mice hearts were tested. RT-qPCR results showed that there were no significant differences in mRNA expression of PDGFR $\alpha$  among four groups (Fig 5A). Compared with other treatments, ISO treatment did not significantly change the mRNA expression of PDGFR $\beta$  (Fig 5A). To assess the myocardial phosphorylation state of PDGFR $\alpha$  and PDGFR $\beta$  (activated form), we performed western blotting for testing the phosphorylated form (p-PDGFR $\alpha$ : Tyr720; p-PDGFR $\beta$ : Tyr740). As shown in Fig 5B, the myocardial phosphorylation of the PDGFR $\alpha$  and PDGFR $\beta$  was increased in ISO-treated group compared with that in vehicle group ( $p < 0.05$ ), but it was significantly inhibited by IMA + ISO treatment compared to ISO treatment ( $p < 0.05$ ).

Due to MMP-9 participation in the degradation of ECM components [34], we assessed the change of MMP-9 in the hearts of model mice. There were no obvious changes of MMP-9 in the mRNA expression and the protein level among the vehicle-, IMA-, ISO- and IMA + ISO-treated groups (Fig 5B and 5C).

### IMA inhibited the expressions of fibrosis related genes by blocking the phosphorylation of PDGFR $\alpha$ in PDGF-AA treated cardiac fibroblasts

PDGF-A and phosphorylated PDGFR $\alpha$  were increased in the ISO-treated group (Figs 4A and 5B). As the PDGF-AA isoform only effectively activates PDGFR $\alpha$  [35], we treated mice cardiac fibroblasts with IMA (0.5  $\mu$ M and 1.0  $\mu$ M) or/and PDGF-AA (10ng/ml) for 24 h. As shown in Fig 6A and 6B, PDGF-AA treatment increased the phosphorylation of PDGFR $\alpha$  in cultured cardiac fibroblasts. IMA administration blocked the phosphorylation of PDGFR $\alpha$  caused by PDGF-AA. The expressions of  $\alpha$ -SMA, collagen I and III were upregulated by PDGF-AA treatment, and were decreased by IMA + PDGF-AA treatment (Fig 6B and 6C).

## Discussion

Cardiac fibrosis is one of significant global health problems and associates with nearly all forms of heart disease [1]. Myocardial infarction, cardiac surgery, pressure overload, cardiomyopathy, toxic factors (such as anthracyclines or alcohol), metabolic disturbances (such as obesity and diabetes), and aging are associated with the development of cardiac fibrosis [36–39]. However, the molecular mechanism underlying cardiac fibrosis has not been fully understood. Therefore, there are currently no efficient therapies available to reverse or arrest the fibrosis.

In this study, we evaluated the anti-fibrotic effect of IMA in ISO-induced cardiac fibrosis mice model. Our findings showed that treatment with 40 mg/kg of IMA decreased the LV thickness, and attenuated the cardiac hypertrophy in the ISO-induced mice model. Treatment with IMA inhibited the apoptosis and proliferation in the ISO-treated heart cells. IMA attenuated the accumulation of interstitial collagens and  $\alpha$ -SMA, and down-regulated the increases of fibrosis related genes in the ISO-induced mice model. The blunting of collagens synthesis caused by IMA was associated with decreased phosphorylation of PDGFR $\alpha$  and  $\beta$ . Moreover, inhibition of PDGFR $\alpha$  by IMA decreased the mRNA expressions of collagen I and III and the protein level of  $\alpha$ -SMA in PDGF-AA-treated mice cardiac fibroblasts. Thus, IMA attenuated the cardiac fibrosis by inhibiting the kinase activation of PDGFRs.

Cardiac fibroblast is widely accepted to be responsible for cardiac fibrosis. TGF- $\beta$ 1 and PDGFs are key driving forces in fibroblasts activation [1]. TGF- $\beta$ 1 binds its receptors and promotes fibrosis by upregulating ECM and tissue inhibitors of matrix metalloproteinase gene expression, as well as suppressing MMP gene level [1]. PDGF-A and PDGF-B induced cardiac fibrosis in transgenic mice by activation of PDGFR $\alpha$  and PDGFR $\beta$ , respectively [40]. PDGF-C induced fibroblasts activation, cardiac fibrosis, hypertrophy, and dilated cardiomyopathy

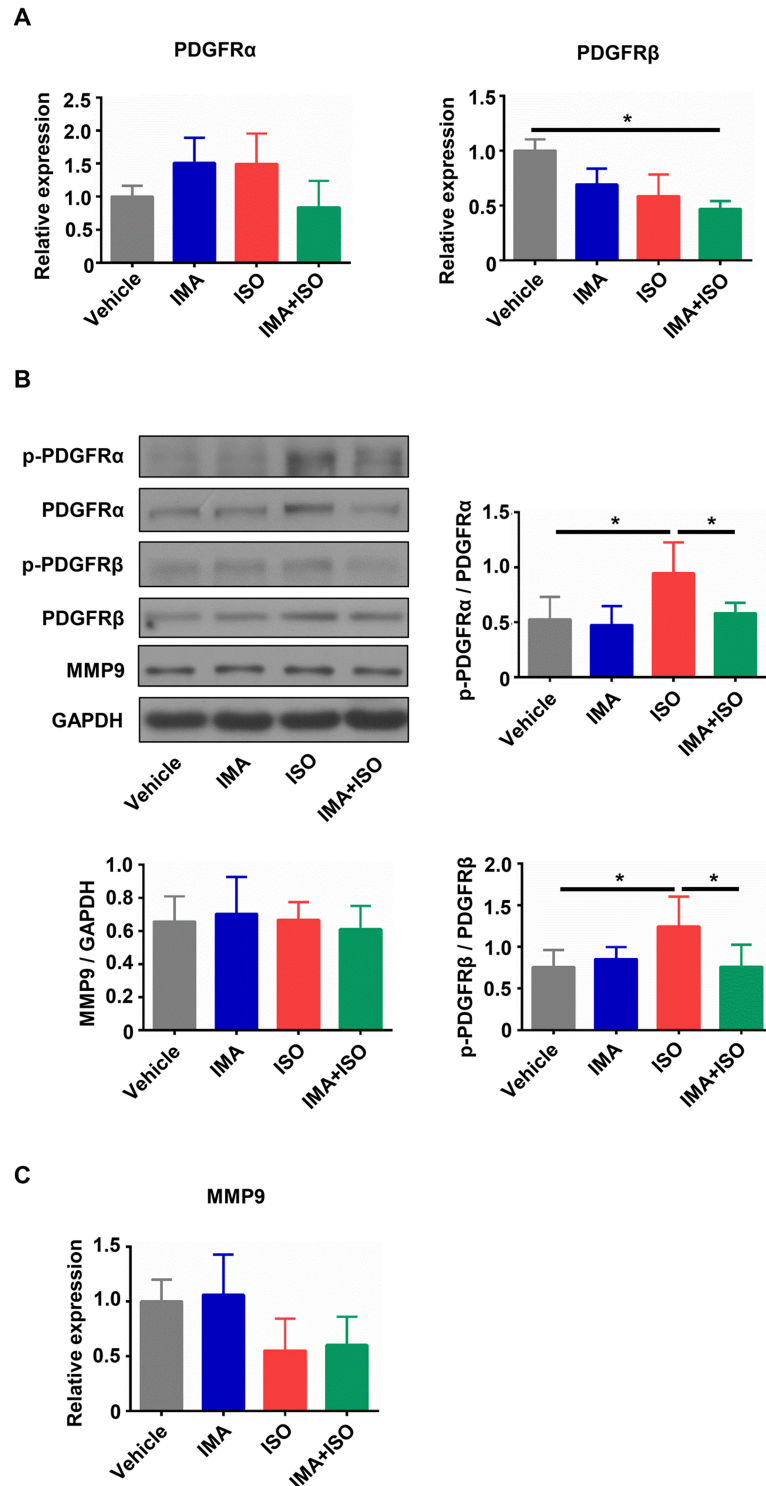

**Fig 5. IMA inhibits the kinase activation of PDGFRs in mice heart tissue.** (A) The mRNA expressions of PDGFR $\alpha$  and PDGFR $\beta$  in hearts from mice treated with vehicle, IMA, ISO, IMA + ISO for one week were tested by RT-qPCR. (B) The lysates of hearts tissue were subjected to western blotting to analyze the phosphorylation level of p-PDGFR $\alpha$  (Tyr720), and p-PDGFR $\beta$  (Tyr740), and the expression of PDGFR $\alpha$ , PDGFR $\beta$ , and MMP-9. The western results from one mouse in each group and statistical analysis of western blot bands are shown. (C) The mRNA expression of MMP-9 in hearts from four groups was tested by RT-qPCR. (n = 5–8 per group, \*:  $p < 0.05$ ).

<https://doi.org/10.1371/journal.pone.0178619.g005>

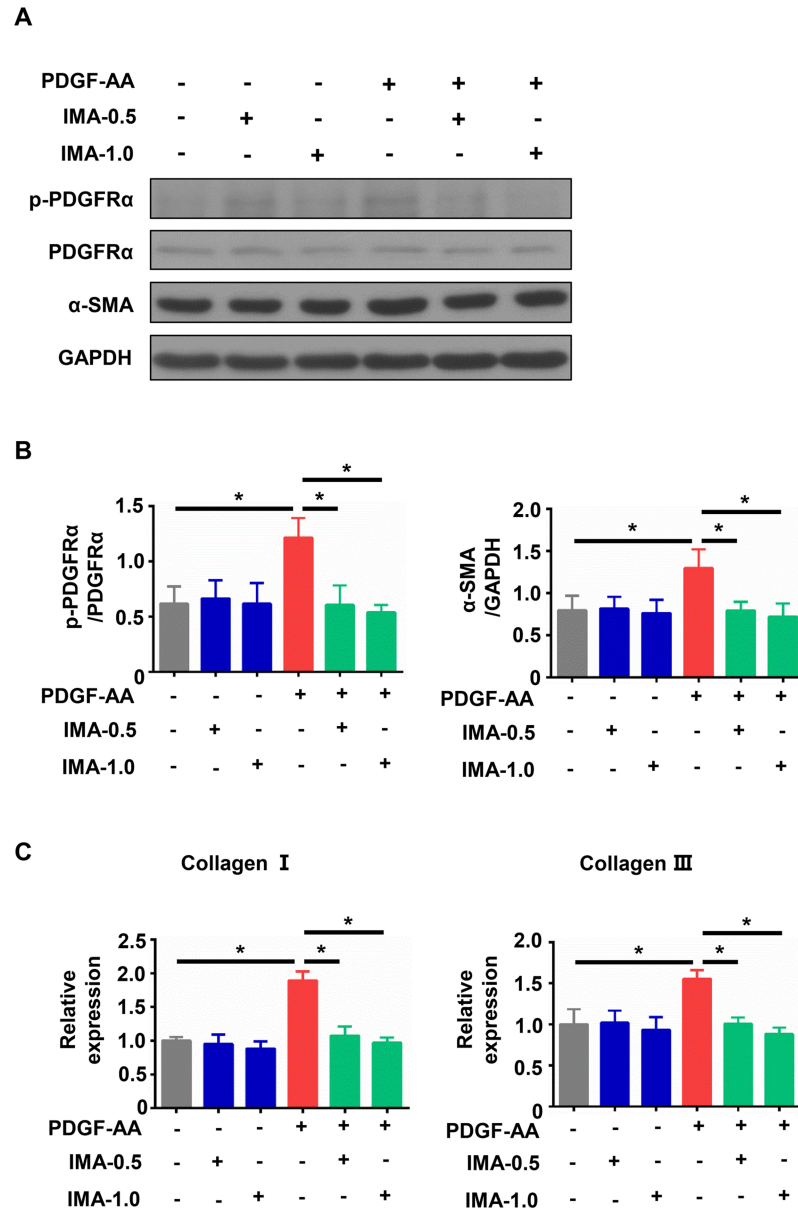

**Fig 6. Effect of IMA in PDGF-AA treated mice cardiac fibroblasts.** Mice cardiac fibroblasts were treated with PDGF-AA (10 ng/ml), IMA-0.5 (0.5  $\mu$ M), IMA-1.0 (1.0  $\mu$ M), PDGF-AA + IMA-0.5, and PDGF-AA + IMA-1.0 for 24 h. (A) The lysates were subjected for western blotting analysis the expression of p-PDGFR $\alpha$ , PDGFR $\alpha$ , and  $\alpha$ -SMA. (B) Quantitative analysis of p-PDGFR $\alpha$  and  $\alpha$ -SMA protein level. (C) The mRNA expression of collagen I and III. The data are representative of three independent experiments. (\*:  $p < 0.05$ ).

<https://doi.org/10.1371/journal.pone.0178619.g006>

through up-regulation and activation of PDGFR $\alpha$  [41]. PDGF-D promoted activation of cardiac fibroblasts by binding PDGFR $\beta$  [9, 42]. In myocardial infarction, PDGF-A and PDGF-D were significantly increased in myofibroblasts [43]. PDGFs not only induced the activation of cardiac fibroblast, but also elevated TGF- $\beta$ 1 expression *in vivo* and *in vitro* [9, 20, 42]. In addition, PDGFs also directly stimulate fibroblasts to contract collagens and differentiate into myofibroblasts [17]. In our study, ISO treatment increased the mRNA expressions of PDGF-A and PDGF-C, enhanced the activation of PDGFR $\alpha$  and PDGFR $\beta$ , and elevated TGF- $\beta$ 1 expression.

However, the PDGF-B and PDGF-D transcriptions were not changed among four groups. These data are in stark contrast to a recent study that PDGF-D was increased in the infarcted heart [43]. Disulfide bridging between PDGF chains results in the formation of the homodimeric molecules PDGF-AA, PDGF-BB, PDGF-CC and PDGF-DD or the heterodimeric PDGF-AB molecule [33]. PDGF-AA induces fibroblasts activation through binding and activating PDGFR $\alpha$  [35]. So cardiac fibroblasts stimulated by PDGF-AA were used to explore the mechanism in our study. We found that IMA inhibited the expressions of fibrosis related genes by blocking the phosphorylation of PDGFR $\alpha$  in PDGF-AA treated cardiac fibroblasts.

MMP-9 can cleave ECM proteins and plays an important role in atherosclerosis, hypertension, myocardial infarction, heart failure, and cardiac fibrosis [34]. The MMP-9 protein level was increased in ISO-induced cardiac hypertrophy rat model [44]. In contrast, ISO treatment did not change the mRNA transcription and the protein level of MMP-9 in mice hearts of our model. There may be some reasons: 1) the responses of rat and mouse to ISO may be different at some extent; 2) the dose of ISO was different (rats subcutaneously injected with 170 mg/kg/d ISO, and mice treated with 20 mg/kg/d ISO); 3) the time of testing MMP-9 was different (4 weeks after administration of ISO for 4 days in rat model, after treatment with ISO for 7 days in mice model).

Animal models are used to better understand the pathogenesis and the mechanism of cardiovascular diseases to improve diagnosis, prevention and therapy of cardiac disease and to help develop and test new diagnostic, preventive and therapeutic procedures [45]. Many animal models have been used for the research of cardiac fibrosis, such as spontaneously hypertensive induced cardiac fibrosis model [18], the surgery models (myocardial infarction model, myocardial ischemia/reperfusion injury model, and transverse aortic constriction model) [45], and the induced models (desoxycorticosterone induced salt-sensitive hypertensive model [19], Ang II induced cardiac fibrosis model [46], and ISO induced cardiac fibrosis model [10]). However, the mechanisms of cardiac fibrosis in different models are diverse. Chronic ISO infusion in mice is a common model system that mimics the elevated catecholamines and sustained  $\beta$ -adrenergic receptors ( $\beta$ -AR) stimulation observed during cardiac hypertrophy that lead to fibrosis [47–50]. In our current study, we found that ISO treatment in C57BL/6 mice increased cardiac hypertrophy, cardiomyocyte death, interstitial fibrosis, and cardiac dysfunction. Moreover, the tyrosine kinase receptors of PDGFRs were activated in ISO-treated hearts. Recent studies showed that enhanced expression of  $\beta$ 3-adrenoceptor, gefitinib, difluoromethylornithine (DFMO) inhibited the cardiac fibrosis in ISO-induced mice model [10, 30, 50]. In this study, we found that IMA attenuated the cardiac fibrosis induced by ISO. Our results indicated that IMA could be a potential therapeutic approach to prevent cardiac fibrosis in clinical application.

The ways of administration and dose of ISO contribute differently on the survival of myocardial cells. As in previous studies (ISO < 50 mg/kg/d), myocardial apoptosis was observed in ISO-induced animal models [30, 50]. However, myocyte apoptosis was not increased after treatment with single injections of 200 or 300 mg/kg ISO in mice [51]. In our study, adult male C57BL/6 mice were treated with ISO (20 mg/kg/d) for one week and we found that apoptosis was significantly increased in ISO-treated mice heart cells. In addition, the proliferation and activation of cardiac fibroblast is recognized for its fundamental contributions to the heart's response to various forms of injury [2]. Our results showed that ISO treatment increased the Ki-67 positive cells in mice hearts. Moreover, the expression of  $\alpha$ -SMA, an important marker of myofibroblasts which are activated fibroblasts, was increased in ISO-treated mice hearts. Our data indicated that ISO treatment increased the proliferation of cardiac fibroblasts, and induced the activation and the differentiation of these cells to myofibroblasts. Furthermore, IMA reduced the apoptosis and proliferation induced by ISO in mice heart cells. These results indicated that IMA inhibited the injury of heart and the activation of cardiac fibroblasts caused by ISO.

Many studies have demonstrated the anti-fibrotic effect of IMA in pulmonary fibrosis, renal fibrosis, liver fibrosis and dermal fibrosis [15, 17, 52–54], whereas few studies have investigated the effect of IMA on the heart. Jang et al reported that IMA attenuated cardiac fibrosis and improved diastolic cardiac dysfunction in a hypertensive rat model [18]. In the desoxycorticosterone induced salt-sensitive hypertensive rat model and the myocardial infarction rat model, IMA attenuated cardiac remodeling and reduced myocardial fibrosis [19, 20]. Consistent with these results, our data showed that IMA attenuated myocardial fibrosis and improved cardiac function in the ISO-treated mice. As a classical tyrosine kinase inhibitor, IMA inhibits the kinase activation of PDGFRs, c-Kit and c-Abl [14]. Recent studies demonstrated that the mechanisms of inhibition fibrosis by IMA were associated with blocking the activation of PDGFRs, and c-Abl [18–20]. Our results showed that IMA inhibited the activation of PDGFR $\alpha$  and PDGFR $\beta$  and decreased the mRNA expression of TGF- $\beta$ 1.

In a hypertensive rat model, IMA attenuated cardiac fibrosis by inhibiting the activation of PDGFR $\beta$  as well as the phosphorylation of c-Abl [18]. In the hypoxia-induced pulmonary arterial hypertension model, IMA inhibited the perivascular fibrosis via blocking PDGFR $\beta$  pathway [15]. Liu et al reported that IMA inhibited the activation of PDGFR and reduced the mRNA expression of TGF- $\beta$ 1 in myocardial infarction model [20]. In our study, IMA inhibited not only the activation of PDGFR $\beta$  but also the phosphorylation of PDGFR $\alpha$  as well as the up-regulated mRNA of TGF $\beta$ 1 caused by ISO treatment.

The cardiovascular toxicity issue related to IMA is somewhat controversial. Although all TKIs approved for CML therapy share activity against BCR-ABL, they are distinct in their potency and activity against other kinases, and each TKI has a distinct toxic effect profile [55]. Due to the strong potency binding kinase domain of new-generation tyrosine kinase inhibitors, dasatinib, nilotinib, and ponatinib treatment increased the risk of vascular occlusive events compared with IMA treatment in patients with CML [56]. Although some studies have been reported that longer-term IMA treatment was associated with cardiac toxicity, including asymptomatic LV dysfunction and congestive heart failure in patients with CML or GISTs [57, 58], the true incidence of this side effect is still uncertain. Prospective and sequential cardiac imaging in patients on IMA showed a low incidence of asymptomatic cardiac dysfunction, comparable to the expected population incidence [59, 60]. This indicated that IMA-related pathological changes in the myocardium did not necessarily translate into clinical significant cardiac toxicity, especially under short-term treatment with IMA [61]. In addition, IMA reversed experimentally induced PAH in animal models [62]. Our results showed that IMA treatment did not increase the level of serum cTnT and decrease the weight of mice. Moreover, IMA treatment reduced the apoptosis of heart cells caused by ISO. These results indicated that IMA did not cause cardiotoxicity at normal administered dose and had a protective effect on the heart. In others and our studies, the subjects of observation or experiments did not have cardiac failure before the observation or experiments started. And there are no reports to study the cardiovascular toxicity of IMA in cardiac failure patients or animal models. So the short-term and long-term effect of IMA in patients or animal models with cardiac failure need to be further investigated.

In summary, we showed that IMA attenuated cardiac fibrosis and improved diastolic dysfunction in the ISO-induced mice model by inhibiting the phosphorylation of PDGFRs. Our results provided an approach for treatment cardiac fibrosis with IMA in clinical application.

## Supporting information

**S1 Fig. Imatinib has not obvious harm to mice.** After treatment with vehicle, IMA, ISO, IMA plus ISO for one week, mice were euthanized and the hearts were excised at day 8. (A) The

serum cTnT of mice was measured by ELISA. (B) The body weights were monitored and plotted versus time. (n = 8 per group).

(TIF)

**S2 Fig. Imatinib inhibits the increase of  $\alpha$ -SMA induced by ISO in mice hearts.** (A) (B) Histopathological feature of  $\alpha$ -SMA in hearts was tested by immunohistologic analysis (100 $\times$ ) and quantitative analysis. (n = 8 per group, \*:  $p < 0.05$ , \*\*:  $p < 0.01$ ).

(TIF)

**S3 Fig. IMA reduces the mRNA of PDGFs gene induced by ISO.** (A)-(D) The mRNA expression of PDGF-A, PDGF-B, PDGF-C, and PDGF-D in hearts from mice treated with vehicle, IMA, ISO, IMA + ISO for one week was tested by Western blot (n = 5–8 per group, \*:  $p < 0.05$ , \*\*:  $p < 0.01$ ).

(TIF)

## Acknowledgments

We thank Medical Science Experimentation Center, Zhongshan School of Medicine, Sun Yat-sen University for technical support. We thank Prof Zi-jie Long (The Third Affiliated Hospital, Sun Yat-sen University) for reviewing our manuscript.

## Author Contributions

**Conceptualization:** ZKW LXW XY.

**Data curation:** YY.

**Formal analysis:** LXW TF.

**Funding acquisition:** ZKW LXW.

**Investigation:** LXW YY.

**Methodology:** LXW XY YY TF.

**Project administration:** ZKW.

**Resources:** MYL GXC.

**Software:** JH MYL.

**Supervision:** ZKW.

**Validation:** YY TF.

**Visualization:** LXW.

**Writing – original draft:** LXW XY.

**Writing – review & editing:** LXW ZKW.

## References

1. Leask A. Getting to the heart of the matter: new insights into cardiac fibrosis. *Circ Res.* 2015; 116(7):1269–1276. <https://doi.org/10.1161/CIRCRESAHA.116.305381> PMID: 25814687.
2. Travers JG, Kamal FA, Robbins J, Yutzey KE, Blaxall BC. Cardiac Fibrosis: The Fibroblast Awakens. *Circ Res.* 2016; 118(6):1021–1040. <https://doi.org/10.1161/CIRCRESAHA.115.306565> PMID: 26987915.



3. Berk BC, Fujiwara K, Lehoux S. ECM remodeling in hypertensive heart disease. *J Clin Invest.* 2007; 117(3):568–575. <https://doi.org/10.1172/JCI31044> PMID: 17332884.
4. Baudino TA, Carver W, Giles W, Borg TK. Cardiac fibroblasts: friend or foe? *Am J Physiol Heart Circ Physiol.* 2006; 291(3):H1015–1026. <https://doi.org/10.1152/ajpheart.00023.2006> PMID: 16617141.
5. Ieda M, Tsuchihashi T, Ivey KN, Ross RS, Hong TT, Shaw RM, et al. Cardiac fibroblasts regulate myocardial proliferation through beta1 integrin signaling. *Dev Cell.* 2009; 16(2):233–244. <https://doi.org/10.1016/j.devcel.2008.12.007> PMID: 19217425.
6. Souders CA, Bowers SL, Baudino TA. Cardiac fibroblast: the renaissance cell. *Circ Res.* 2009; 105(12):1164–1176. <https://doi.org/10.1161/CIRCRESAHA.109.209809> PMID: 19959782.
7. Tao H, Yang JJ, Shi KH, Li J. Epigenetic factors MeCP2 and HDAC6 control alpha-tubulin acetylation in cardiac fibroblast proliferation and fibrosis. *Inflamm Res.* 2016; 65(5):415–426. <https://doi.org/10.1007/s00011-016-0925-2> PMID: 26975406.
8. Fan Z, Guan J. Antifibrotic therapies to control cardiac fibrosis. *Biomater Res.* 2016; 20:13. <https://doi.org/10.1186/s40824-016-0060-8> PMID: 27226899.
9. Zhao T, Zhao W, Chen Y, Li VS, Meng W, Sun Y. Platelet-derived growth factor-D promotes fibrogenesis of cardiac fibroblasts. *Am J Physiol Heart Circ Physiol.* 2013; 304(12):H1719–1726. <https://doi.org/10.1152/ajpheart.00130.2013> PMID: 23585135.
10. Belge C, Hammond J, Dubois-Deruy E, Manoury B, Hamelet J, Beauloye C, et al. Enhanced expression of beta3-adrenoceptors in cardiac myocytes attenuates neurohormone-induced hypertrophic remodeling through nitric oxide synthase. *Circulation.* 2014; 129(4):451–462. <https://doi.org/10.1161/CIRCULATIONAHA.113.004940> PMID: 24190960.
11. Dang MQ, Zhao XC, Lai S, Wang X, Wang L, Zhang YL, et al. Gene expression profile in the early stage of angiotensin II-induced cardiac remodeling: a time series microarray study in a mouse model. *Cell Physiol Biochem.* 2015; 35(2):467–476. <https://doi.org/10.1159/000369712> PMID: 25613478.
12. Stagno F, Stella S, Spitaleri A, Pennisi MS, Di Raimondo F, Vigneri P. Imatinib mesylate in chronic myeloid leukemia: frontline treatment and long-term outcomes. *Expert Rev Anticancer Ther.* 2016; 16(3):273–278. <https://doi.org/10.1586/14737140.2016.1151356> PMID: 26852913.
13. Milhem M, Deutsch JM. Imatinib Dosing in Gastrointestinal Stromal Tumors (GISTs): When, How Much, and How Long? *Curr Clin Pharmacol.* 2015; 10(4):311–320. PMID: 26548908.
14. Grimminger F, Schermuly RT, Ghofrani HA. Targeting non-malignant disorders with tyrosine kinase inhibitors. *Nat Rev Drug Discov.* 2010; 9(12):956–970. <https://doi.org/10.1038/nrd3297> PMID: 21119733.
15. Ciucan L, Hussey MJ, Burton V, Good R, Duggan N, Beach S, et al. Imatinib attenuates hypoxia-induced pulmonary arterial hypertension pathology via reduction in 5-hydroxytryptamine through inhibition of tryptophan hydroxylase 1 expression. *Am J Respir Crit Care Med.* 2013; 187(1):78–89. <https://doi.org/10.1164/rccm.201206-1028OC> PMID: 23087024.
16. Soria A, Cario-Andre M, Lepreux S, Rezvani HR, Pasquet JM, Pain C, et al. The effect of imatinib (Gleevec) on scleroderma and normal dermal fibroblasts: a preclinical study. *Dermatology.* 2008; 216(2):109–117. <https://doi.org/10.1159/000111507> PMID: 18216472.
17. Wang S, Wilkes MC, Leof EB, Hirschberg R. Imatinib mesylate blocks a non-Smad TGF-beta pathway and reduces renal fibrogenesis in vivo. *FASEB J.* 2005; 19(1):1–11. <https://doi.org/10.1096/fj.04-2370com> PMID: 15629889.
18. Jang SW, Ihm SH, Choo EH, Kim OR, Chang K, Park CS, et al. Imatinib mesylate attenuates myocardial remodeling through inhibition of platelet-derived growth factor and transforming growth factor activation in a rat model of hypertension. *Hypertension.* 2014; 63(6):1228–1234. <https://doi.org/10.1161/HYPERTENSIONAHA.113.01866> PMID: 24591339.
19. Fan B, Ma L, Li Q, Wang L, Zhou J, Wu J. Role of PDGFs/PDGFRs signaling pathway in myocardial fibrosis of DOCA/salt hypertensive rats. *Int J Clin Exp Pathol.* 2014; 7(1):16–27. PMID: 24427322.
20. Liu C, Zhao W, Meng W, Zhao T, Chen Y, Ahokas RA, et al. Platelet-derived growth factor blockade on cardiac remodeling following infarction. *Mol Cell Biochem.* 2014; 397(1–2):295–304. <https://doi.org/10.1007/s11010-014-2197-x> PMID: 25148874.
21. Benjamin IJ, Jalil JE, Tan LB, Cho K, Weber KT, Clark WA. Isoproterenol-induced myocardial fibrosis in relation to myocyte necrosis. *Circ Res.* 1989; 65(3):657–670. PMID: 2527639.
22. Nagano M, Higaki J, Nakamura F, Higashimori K, Nagano N, Mikami H, et al. Role of cardiac angiotensin II in isoproterenol-induced left ventricular hypertrophy. *Hypertension.* 1992; 19(6 Pt 2):708–712. PMID: 1534315.
23. Samuel CS, Bodaragama H, Chew JY, Widdop RE, Royce SG, Hewitson TD. Serelaxin is a more efficacious antifibrotic than enalapril in an experimental model of heart disease. *Hypertension.* 2014; 64(2):315–322. <https://doi.org/10.1161/HYPERTENSIONAHA.114.03594> PMID: 24866131.

24. Gaspard GJ, MacLean J, Rioux D, Pasumarthi KBS. A novel beta-adrenergic response element regulates both basal and agonist-induced expression of cyclin-dependent kinase 1 gene in cardiac fibroblasts. *Am J Physiol-Cell Ph.* 2014; 306(6):C540–C550. <https://doi.org/10.1152/ajpcell.00206.2013> PMID: 24477232.
25. Sun M, Yu HY, Zhang YY, Li ZJ, Gao W. MicroRNA-214 Mediates Isoproterenol-induced Proliferation and Collagen Synthesis in Cardiac Fibroblasts. *Sci Rep-Uk.* 2015; 5:18351. <https://doi.org/10.1038/Srep18351> PMID: 26692091.
26. Hohimer AR, Davis LE, Hatton DC. Repeated daily injections and osmotic pump infusion of isoproterenol cause similar increases in cardiac mass but have different effects on blood pressure. *Can J Physiol Pharmacol.* 2005; 83(2):191–197. <https://doi.org/10.1139/y04-137> PMID: 15791293.
27. Liu C, Zhao WY, Meng WX, Zhao TQ, Chen YJ, Ahokas RA, et al. Platelet-derived growth factor blockade on cardiac remodeling following infarction. *Mol Cell Biochem.* 2014; 397(1–2):295–304. <https://doi.org/10.1007/s11010-014-2197-x> PMID: 25148874.
28. Hope TA, LeBoit PE, High WA, Fu YJ, Brasch RC. Evaluation of imatinib mesylate as a possible treatment for nephrogenic systemic fibrosis in a rat model. *Magn Reson Imaging.* 2013; 31(1):139–144. <https://doi.org/10.1016/j.mri.2012.06.027> PMID: 22898683.
29. Balasubramanian S, Pleasant DL, Kasiganesan H, Quinones L, Zhang Y, Sundararaj KP, et al. Dasatinib Attenuates Pressure Overload Induced Cardiac Fibrosis in a Murine Transverse Aortic Constriction Model. *PLoS One.* 2015; 10(10):e0140273. <https://doi.org/10.1371/journal.pone.0140273> PMID: 26458186.
30. Lin Y, Zhang X, Xiao W, Li B, Wang J, Jin L, et al. Endoplasmic Reticulum Stress is Involved in DFMO Attenuating Isoproterenol-Induced Cardiac Hypertrophy in Rats. *Cell Physiol Biochem.* 2016; 38(4):1553–1562. <https://doi.org/10.1159/000443096> PMID: 27074051.
31. Leask A, Abraham DJ. TGF-beta signaling and the fibrotic response. *FASEB J.* 2004; 18(7):816–827. <https://doi.org/10.1096/fj.03-1273rev> PMID: 15117886.
32. Olson LE, Soriano P. Increased PDGFRalpha activation disrupts connective tissue development and drives systemic fibrosis. *Dev Cell.* 2009; 16(2):303–313. <https://doi.org/10.1016/j.devcel.2008.12.003> PMID: 19217431.
33. Andrae J, Gallini R, Betsholtz C. Role of platelet-derived growth factors in physiology and medicine. *Genes Dev.* 2008; 22(10):1276–1312. <https://doi.org/10.1101/gad.1653708> PMID: 18483217.
34. Iyer RP, Jung M, Lindsey ML. MMP-9 signaling in the left ventricle following myocardial infarction. *Am J Physiol Heart Circ Physiol.* 2016; 311(1):H190–198. <https://doi.org/10.1152/ajpheart.00243.2016> PMID: 27208160.
35. Grimminger F, Schermuly RT. PDGF Receptor and its Antagonists: Role in Treatment of PAH. *Adv Exp Med Biol.* 2010; 661:435–446. [https://doi.org/10.1007/978-1-60761-500-2\\_28](https://doi.org/10.1007/978-1-60761-500-2_28) PMID: 20204747
36. Kong P, Christia P, Frangogiannis NG. The pathogenesis of cardiac fibrosis. *Cell Mol Life Sci.* 2014; 71(4):549–574. <https://doi.org/10.1007/s00018-013-1349-6> PMID: 23649149.
37. Kania G, Blyszczuk P, Eriksson U. Mechanisms of cardiac fibrosis in inflammatory heart disease. *Trends Cardiovasc Med.* 2009; 19(8):247–252. <https://doi.org/10.1016/j.tcm.2010.02.005> PMID: 20447565.
38. Asbun J, Villarreal FJ. The pathogenesis of myocardial fibrosis in the setting of diabetic cardiomyopathy. *J Am Coll Cardiol.* 2006; 47(4):693–700. <https://doi.org/10.1016/j.jacc.2005.09.050> PMID: 16487830.
39. Ashrafian H, McKenna WJ, Watkins H. Disease pathways and novel therapeutic targets in hypertrophic cardiomyopathy. *Circ Res.* 2011; 109(1):86–96. <https://doi.org/10.1161/CIRCRESAHA.111.242974> PMID: 21700950.
40. Gallini R, Lindblom P, Bondjers C, Betsholtz C, Andrae J. PDGF-A and PDGF-B induces cardiac fibrosis in transgenic mice. *Exp Cell Res.* 2016; 349(2):282–290. <https://doi.org/10.1016/j.yexcr.2016.10.022> PMID: 27816607.
41. Ponten A, Li X, Thoren P, Aase K, Sjoblom T, Ostman A, et al. Transgenic overexpression of platelet-derived growth factor-C in the mouse heart induces cardiac fibrosis, hypertrophy, and dilated cardiomyopathy. *Am J Pathol.* 2003; 163(2):673–682. [https://doi.org/10.1016/S0002-9440\(10\)63694-2](https://doi.org/10.1016/S0002-9440(10)63694-2) PMID: 12875986.
42. Ponten A, Folestad EB, Pietras K, Eriksson U. Platelet-derived growth factor D induces cardiac fibrosis and proliferation of vascular smooth muscle cells in heart-specific transgenic mice. *Circ Res.* 2005; 97(10):1036–1045. <https://doi.org/10.1161/01.RES.0000190590.31545.d4> PMID: 16224065.
43. Zhao W, Zhao T, Huang V, Chen Y, Ahokas RA, Sun Y. Platelet-derived growth factor involvement in myocardial remodeling following infarction. *J Mol Cell Cardiol.* 2011; 51(5):830–838. <https://doi.org/10.1016/j.yjmcc.2011.06.023> PMID: 21767547.

44. Zhang X, Zhang T, Wu J, Yu X, Zheng D, Yang F, et al. Calcium sensing receptor promotes cardiac fibroblast proliferation and extracellular matrix secretion. *Cell Physiol Biochem*. 2014; 33(3):557–568. <https://doi.org/10.1159/000358634> PMID: 24603056.
45. Rai V, Sharma P, Agrawal S, Agrawal DK. Relevance of mouse models of cardiac fibrosis and hypertrophy in cardiac research. *Mol Cell Biochem*. 2017; 424(1–2):123–145. <https://doi.org/10.1007/s11010-016-2849-0> PMID: 27766529.
46. Ma F, Li Y, Jia L, Han Y, Cheng J, Li H, et al. Macrophage-stimulated cardiac fibroblast production of IL-6 is essential for TGF beta/Smad activation and cardiac fibrosis induced by angiotensin II. *PloS one*. 2012; 7(5):e35144. <https://doi.org/10.1371/journal.pone.0035144> PMID: 22574112;
47. Boluyt MO, Long X, Eschenhagen T, Mende U, Schmitz W, Crow MT, et al. Isoproterenol infusion induces alterations in expression of hypertrophy-associated genes in rat heart. *Am J Physiol*. 1995; 269(2 Pt 2):H638–647. PMID: 7653628.
48. Galindo CL, Skinner MA, Errami M, Olson LD, Watson DA, Li J, et al. Transcriptional profile of isoproterenol-induced cardiomyopathy and comparison to exercise-induced cardiac hypertrophy and human cardiac failure. *BMC physiol*. 2009; 9:23. <https://doi.org/10.1186/1472-6793-9-23> PMID: 20003209.
49. Molojavyi A, Lindecke A, Raupach A, Moellendorf S, Kohrer K, Godecke A. Myoglobin-deficient mice activate a distinct cardiac gene expression program in response to isoproterenol-induced hypertrophy. *Physiol genomics*. 2010; 41(2):137–145. <https://doi.org/10.1152/physiolgenomics.90297.2008> PMID: 20145201.
50. Grisanti LA, Repas AA, Talarico JA, Gold JI, Carter RL, Koch WJ, et al. Temporal and gefitinib-sensitive regulation of cardiac cytokine expression via chronic beta-adrenergic receptor stimulation. *Am J Physiol Heart Circ Physiol*. 2015; 308(4):H316–330. <https://doi.org/10.1152/ajpheart.00635.2014> PMID: 25485901.
51. Wallner M, Duran JM, Mohsin S, Troupes CD, Vanhoutte D, Borghetti G, et al. Acute Catecholamine Exposure Causes Reversible Myocyte Injury Without Cardiac Regeneration. *Circ Res*. 2016; 119(7):865–879. <https://doi.org/10.1161/CIRCRESAHA.116.308687> PMID: 27461939.
52. Qu K, Huang Z, Lin T, Liu S, Chang H, Yan Z, et al. New Insight into the Anti-liver Fibrosis Effect of Multi-targeted Tyrosine Kinase Inhibitors: From Molecular Target to Clinical Trials. *Front Pharmacol*. 2015; 6:300. <https://doi.org/10.3389/fphar.2015.00300> PMID: 26834633.
53. Distler JH, Distler O. Imatinib as a novel therapeutic approach for fibrotic disorders. *Rheumatology*. 2009; 48(1):2–4. <https://doi.org/10.1093/rheumatology/ken431> PMID: 19029132.
54. Akhmetshina A, Dees C, Pileckyte M, Maurer B, Axmann R, Jungel A, et al. Dual inhibition of c-abl and PDGF receptor signaling by dasatinib and nilotinib for the treatment of dermal fibrosis. *FASEB J*. 2008; 22(7):2214–2222. <https://doi.org/10.1096/fj.07-105627> PMID: 18326784.
55. Gambacorti-Passerini C, Cortes JE, Lipton JH, Dmoszynska A, Wong RS, Rossiev V, et al. Safety of bosutinib versus imatinib in the phase 3 BELA trial in newly diagnosed chronic phase chronic myeloid leukemia. *Am J Hematol*. 2014; 89(10):947–953. <https://doi.org/10.1002/ajh.23788> PMID: 24944159.
56. Douxfils J, Haguet H, Mullier F, Chatelain C, Graux C, Dogne JM. Association Between BCR-ABL Tyrosine Kinase Inhibitors for Chronic Myeloid Leukemia and Cardiovascular Events, Major Molecular Response, and Overall Survival: A Systematic Review and Meta-analysis. *JAMA Oncol*. 2016; 2(5):625–632 <https://doi.org/10.1001/jamaoncol.2015.5932> PMID: 26847662.
57. Kerkela R, Grazette L, Yacobi R, Iliescu C, Patten R, Beahm C, et al. Cardiotoxicity of the cancer therapeutic agent imatinib mesylate. *Nat Med*. 2006; 12(8):908–916. <https://doi.org/10.1038/nm1446> PMID: 16862153.
58. Turrisi G, Montagnani F, Grotti S, Marinozzi C, Bolognese L, Fiorentini G. Congestive heart failure during imatinib mesylate treatment. *Int J Cardiol*. 2010; 145(1):148–150. <https://doi.org/10.1016/j.ijcard.2009.07.006> PMID: 19656583.
59. Estabragh ZR, Knight K, Watmough SJ, Lane S, Vinjamuri S, Hart G, et al. A prospective evaluation of cardiac function in patients with chronic myeloid leukaemia treated with imatinib. *Leuk Res*. 2011; 35(1):49–51. <https://doi.org/10.1016/j.leukres.2010.08.020> PMID: 21030079.
60. Trent JC, Patel SS, Zhang J, Araujo DM, Plana JC, Lenihan DJ, et al. Rare incidence of congestive heart failure in gastrointestinal stromal tumor and other sarcoma patients receiving imatinib mesylate. *Cancer*. 2010; 116(1):184–192. <https://doi.org/10.1002/cncr.24683> PMID: 19885836.
61. Marcolino MS, Boersma E, Clementino NCD, Nunes MDP, Barbosa MM, Silva MHCR, et al. The duration of the use of imatinib mesylate is only weakly related to elevated BNP levels in chronic myeloid leukaemia patients. *Hematol Oncol*. 2011; 29(3):124–130. <https://doi.org/10.1002/hon.967> PMID: 20860069.
62. Schermuly RT, Dony E, Ghofrani HA, Pullamsetti S, Savai R, Roth M, et al. Reversal of experimental pulmonary hypertension by PDGF inhibition. *J Clin Invest*. 2005; 115(10):2811–2821. <https://doi.org/10.1172/JCI24838> PMID: 16200212.
